# Supplementary material for: Why are African American Governors and U.S. Senators so Rare? Exploring White Voters’ Responses to African American Statewide Candidates
Source: Springer Nature journal article supplement (doi:10.1007/s11109-018-9496-y), 2018-08-28
Supplement: MOESM1 [file 16080786]

**Online Appendix**

Table 1: African American challengers facing white opponents since 2000 (left); White comparison candidates since 2000, 3-4 white per 1 African American (right)

1

| **Black candidates** | | | | |  | **White candidates** | | | | |
| --- | --- | --- | --- | --- | --- | --- | --- | --- | --- | --- |
| Name | State | Office | Year | Party |  | Name | State | Office | Year | Party |
| Jack Robinson | MA | U.S. Senate | 2000 | R |  | Mitt Romney | MA | U.S. Senate | 1994 | R |
| William Weld | MA | U.S. Senate | 1996 | R |
| Kenneth Chase | MA | U.S. Senate | 2006 | R |
| Troy Brown | MS | U.S. Senate | 2000 | D |  | Ken Harper | MS | U.S. Senate | 1994 | D |
| Bootie Hunt | MS | U.S. Senate | 1996 | D |
| Ronnie Musgrove | MS | U.S. Senate | 2008 | D |
| Ron Kirk | TX | U.S. Senate | 2002 | D |  | Victor Morales | TX | U.S. Senate | 1996 | D |
| Gene Kelly | TX | U.S. Senate | 2000 | D |
| Barbara Ann Radnofsky | TX | U.S. Senate | 2006 | D |
| Rick Noriega | TX | U.S. Senate | 2008 | D |
| Joe Neal | NV | Governor | 2002 | D |  | Jan Laverty Jones | NV | Governor | 1998 | D |
| Dina Titus | NV | Governor | 2006 | D |
| Rory Reid | NV | Governor | 2010 | D |
| H. Carl McCall | NY | Governor | 2002 | D |  | Peter Vallone | NY | Governor | 1998 | D |
| Eliot Spitzer | NY | Governor | 2006 | D |
| Andrew Cuomo | NY | Governor | 2010 | D |
| Denise Majette | GA | U.S. Senate | 2004 | D |  | Max Cleland | GA | U.S. Senate | 1996 | D |
| Michael Coles | GA | U.S. Senate | 1998 | D |
| Jim Martin | GA | U.S. Senate | 2008 | D |
| Marvin Scott | IN | U.S. Senate | 2004 | R |  | Paul Helmke | IN | U.S. Senate | 1998 | R |
| Dan Coats | IN | U.S. Senate | 2010 | R |
| Richard Mourdock | IN | U.S. Senate | 2012 | R |
| Wayne Sowell | AL | U.S. Senate | 2004 | D |  | Clayton Suddith | AL | U.S. Senate | 1998 | D |
| Susan Parker | AL | U.S. Senate | 2002 | D |
| William Barnes | AL | U.S. Senate | 2010 | D |
| Deval Patrick | MA | Governor | 2006 | D |  | Scott Harshbarger | MA | Governor | 1998 | D |
| Shannon O’Brien | MA | Governor | 2002 | D |
| Martha Coakley | MA | Governor | 2014 | D |
| Harold Ford, Jr. | TN | U.S. Senate | 2006 | D |  | Jeff Clark | TN | U.S. Senate | 2000 | D |
| Bob Clement | TN | U.S. Senate | 2002 | D |
| Bob Tuke | TN | U.S. Senate | 2008 | D |
| Mark Clayton | TN | U.S. Senate | 2012 | D |
| Erik Fleming | MS | U.S. Senate | 2006 | D |  | Ronnie Musgrove | MS | U.S. Senate | 2008 | D |
| Albert Gore | MS | U.S. Senate | 2012 | D |
| Travis Childers | MS | U.S. Senate | 2014 | D |
| Ken Blackwell  2 | OH | Governor | 2006 | R |  | George Voinovich | OH | Governor | 1990 | R |
| Bob Taft | OH | Governor | 1998 | R |
| John Kasich | OH | Governor | 2010 | R |
| Michael Steele | MD | U.S. Senate | 2006 | R |  | Paul Rapaport | MD | U.S. Senate | 2000 | R |
| E.J. Pipkin | MD | U.S. Senate | 2004 | R |
| Eric Wargotz | MD | U.S. Senate | 2010 | R |
| Dan Bonigno | MD | U.S. Senate | 2012 | R |
| Lynn Swann | PA | Governor | 2006 | R |  | Tom Ridge | PA | Governor | 1994 | R |
| Mike Fisher | PA | Governor | 2002 | R |
| Tom Corbett | PA | Governor | 2010 | R |
| Vivian Davis Figures | AL | U.S. Senate | 2008 | D |  | Clayton Suddith | AL | U.S. Senate | 1998 | D |
| Susan Parker | AL | U.S. Senate | 2002 | D |
| William Barnes | AL | U.S. Senate | 2010 | D |
| Erik Fleming | MS | U.S. Senate | 2008 | D |  | Ronnie Musgrove | MS | U.S. Senate | 2008 | D |
| Albert Gore | MS | U.S. Senate | 2012 | D |
| Travis Childers | MS | U.S. Senate | 2014 | D |
| Kendrick Meek | FL | U.S. Senate | 2010 | D |  | Hugh Rodham | FL | U.S. Senate | 1994 | D |
| Bill Nelson | FL | U.S. Senate | 2000 | D |
| Betty Castor | FL | U.S. Senate | 2004 | D |
| Mike Thurmond | GA | U.S. Senate | 2010 | D |  | Michael Coles | GA | U.S. Senate | 1998 | D |
| Jim Martin | GA | U.S. Senate | 2008 | D |
| Michelle Nunn | GA | U.S. Senate | 2014 | D |
| Alvin Greene | SC | U.S. Senate | 2010 | D |  | Inez Tenenbaum | SC | U.S. Senate | 2004 | D |
| Bob Conley | SC | U.S. Senate | 2008 | D |
| Brad Hutto | SC | U.S. Senate | 2014 | D |
| Johnny Dupree | MS | Governor | 2011 | D |  | Dick Molpus | MS | Governor | 1995 | D |
| Ronnie Musgrove | MS | Governor | 1999 | D |
| John Eaves | MS | Governor | 2007 | D |
| Randy Brock | VT | Governor | 2012 | R |  | Jim Douglas | VT | Governor | 2002 | R |
| Brian Dubie | VT | Governor | 2010 | R |
| Scott Milne | VT | Governor | 2014 | R |
| Cory Booker | NJ | U.S. Senate | 2013 | D |  | Jon Corzine | NJ | U.S. Senate | 2000 | D |
| Frank Lautenberg | NJ | U.S. Senate | 2002 | D |
| Bob Menendez | NJ | U.S. Senate | 2006 | D |
| Anthony Brown | MD | Governor | 2014 | D |  | Parris Glendening | MD | Governor | 1994 | D |
| Kathleen Kennedy Townsend | MD | Governor | 2002 | D |
| Martin O’Malley | MD | Governor | 2006 | D |
| Constance Johnson | OK | U.S. Senate | 2014 | D |  | Andrew Rice | OK | U.S. Senate | 2008 | D |
| Jim Rogers | OK | U.S. Senate | 2010 | D |
| Matt Silverstein | OK | U.S. Senate | 2014 | D |

3

Table 2: Impact of African American candidates on three key outcome measures for African American and white candidates matched using exact matching on state, party, office sought, and whether the contest was for an open seat, and nearest neighbor matching on all other covariates, including full set of controls (OLS coefficients for *Black* shown in column 4 of Table 4)

|  | % chance of victory  (OLS) | Margin of victory among white voters (OLS) | Margin of victory among all voters (OLS) |
| --- | --- | --- | --- |
| **Black (0=white, 1=black)** | **-28.07****  **(14.51)** | **-18.91*****  **(3.23)** | **-11.61*****  **(4.58)** |
| Quality – previous experience (0=least, 3=most) | -7.44  (8.14) | -1.66  (1.81) | -1.46  (2.57) |
| Quality – fundraising total (in millions) | 1.88  (1.96) | 1.29***  (0.44) | 0.98*  (0.62) |
| Open seat (0=no, 1=yes) | 47.03**  (19.59) | 26.15***  (4.36) | 15.84***  (6.19) |
| Ideological extremity (absolute value of CF score) | 1.25  (25.72) | 6.50  (5.72) | 0.81  (8.12) |
| State economic performance | 2.26  (3.72) | -1.90**  (0.83) | -1.79*  (1.18) |
| Party advantage (%; neg=favors opp party, pos=favors own party) | 0.07  (0.62) | -0.16  (0.14) | 0.04  (0.20) |
| Black population in state (%) | 0.45  (0.68) | -1.17***  (0.15) | -0.11  (0.22) |
| Male (0=female, 1=male) | 0.69  (30.49) | 7.89  (6.79) | -4.24  (9.63) |
| Running for U.S. Senate (0=running for governor, 1=running for U.S. Senate) | 2.87  (15.90) | -10.09***  (3.54) | -3.05  (5.02) |
| (intercept) | 0.09  (45.23) | -15.68*  (10.07) | -3.67  (14.29) |
| N | 34 | 34 | 34 |
| Adjusted R-squared | 0.27 | 0.92 | 0.52 |

*p<0.1; **p<0.05; ***p<0.01, all one-tailed tests

Table 3: Impact of African American candidates on three key outcome measures for African American and white candidates matched using exact matching on state, party, and office sought and nearest neighbor matching on all other covariates, including full set of controls (OLS coefficients for *Black* shown in column 6 of Table 4)

|  | % chance of victory  (OLS) | Margin of victory among white voters (OLS) | Margin of victory among all voters (OLS) |
| --- | --- | --- | --- |
| **Black (0=white, 1=black)** | **-21.80****  **(9.63)** | **-14.80*****  **(4.70)** | **-10.58*****  **(3.48)** |
| Quality – previous experience (0=least, 3=most) | -0.74  (6.70) | -0.18  (3.27) | 0.63  (2.42) |
| Quality – fundraising total (in millions) | 2.29**  (0.95) | 1.27***  (0.46) | 0.91***  (0.34) |
| Open seat (0=no, 1=yes) | 10.35  (13.72) | 17.79***  (6.71) | 11.23**  (4.96) |
| Ideological extremity (absolute value of CF score) | -9.21  (19.26) | 25.64***  (9.41) | 0.23  (6.96) |
| State economic performance | 1.22  (2.60) | -0.28  (1.27) | -0.36  (0.94) |
| Party advantage (%; neg=favors opp party, pos=favors own party) | 0.52  (0.41) | -0.04  (0.20) | 0.24*  (0.15) |
| Black population in state (%) | -0.03  (0.49) | -0.91***  (0.24) | 0.14  (0.18) |
| Male (0=female, 1=male) | 5.41  (17.98) | 0.55  (8.79) | -0.30  (6.50) |
| Running for U.S. Senate (0=running for governor, 1=running for U.S. Senate) | -0.80  (12.53) | -12.82**  (6.12) | -3.39  (4.53) |
| (intercept) | 16.62  (28.55) | 32.35  (13.95) | -19.34**  (10.31) |
| N | 46 | 46 | 46 |
| Adjusted R-squared | 0.35 | 0.71 | 0.59 |

*p<0.1; **p<0.05; ***p<0.01, all one-tailed tests

Table 4: Impact of African American candidates on three key outcome measures for African American and white candidates matched using nearest neighbor matching on all covariates, including full set of controls (OLS coefficients for *Black* shown in column 8 of Table 4)

|  | % chance of victory  (OLS) | Margin of victory among white voters (OLS) | Margin of victory among all voters (OLS) |
| --- | --- | --- | --- |
| **Black (0=white, 1=black)** | **-16.70***  **(10.62)** | **-10.63****  **(4.43)** | **-10.38*****  **(3.46)** |
| Quality – previous experience (0=least, 3=most) | 0.26  (6.46) | 4.27*  (2.69) | 3.05*  (2.10) |
| Quality – fundraising total (in millions) | 0.66  (0.60) | 0.33  (0.25) | 0.38**  (0.20) |
| Open seat (0=no, 1=yes) | 9.94  (14.78) | 15.72***  (6.16) | 10.77**  (4.81) |
| Ideological extremity (absolute value of CF score) | -22.31  (20.50) | 15.84**  (8.55) | 6.67  (6.67) |
| State economic performance | 2.68  (2.54) | 1.00  (1.06) | -0.14  (0.83) |
| Party advantage (%; neg=favors opp party, pos=favors own party) | 0.90**  (0.41) | 0.27*  (0.17) | 0.30**  (0.13) |
| Black population in state (%) | -0.20  (0.54) | -0.88***  (0.23) | 0.23*  (0.18) |
| Male (0=female, 1=male) | 20.58  (17.20) | 9.80*  (7.17) | 1.14  (5.60) |
| Running for U.S. Senate (0=running for governor, 1=running for U.S. Senate) | 9.27  (11.31) | -7.37*  (4.72) | -2.78  (3.68) |
| (intercept) | 10.63  (30.56) | -45.32***  (12.74) | -29.05***  (9.94) |
| N | 46 | 46 | 46 |
| Adjusted R-squared | 0.30 | 0.74 | 0.63 |

*p<0.1; **p<0.05; ***p<0.01, all one-tailed tests

Table 5: (OLS) Impact of African American candidate on three key outcome measures using Major Party Index (MPI) as an alternative measure of a state’s partisanship

|  | % chance of victory  (OLS) | Margin of victory among white voters (OLS) | Margin of victory among all voters (OLS) |
| --- | --- | --- | --- |
| **Black (0=white, 1=black)** | **-18.09****  **(10.30)** | **-14.08*****  **(3.62)** | **-10.43*****  **(3.14)** |
| Quality – previous experience (0=least, 3=most) | -2.18  (5.05) | 1.98  (1.78) | 0.83  (1.54) |
| Quality – fundraising total (in millions) | -0.28  (0.61) | 0.38**  (0.22) | 0.23  (0.19) |
| Open seat (0=no, 1=yes) | 18.40*  (11.48) | 9.09**  (4.04) | 11.28***  (3.50) |
| Ideological extremity (absolute value of CF score) | -35.37*  (21.60) | 4.75  (7.60) | -5.27  (6.58) |
| State economic performance | 2.41  (3.33) | -1.66*  (1.17) | 0.24  (1.02) |
| Major Party Index (%; neg=favors opp party, pos=favors own party) | 1.27  (0.99) | 1.36***  (0.35) | 0.92***  (0.30) |
| Black population in state (%) | 5.26  (8.29) | -3.26  (2.92) | 0.61  (2.52) |
| Male (0=female, 1=male) | 33.16***  (13.27) | 6.18*  (4.67) | 5.38*  (4.04) |
| Running for U.S. Senate (0=running for governor, 1=running for U.S. Senate) | -64.49  (62.37) | 62.92***  (21.95) | 13.32  (19.00) |
| (intercept) | 14.88  (217.63) | -31.88  (76.58) | -49.30  (66.28) |
| State fixed effects | Yes | Yes | Yes |
| Party-Year fixed effects | Yes | Yes | Yes |
| N | 92 | 92 | 92 |
| Adjusted R-squared | 0.49 | 0.86 | 0.72 |

*p<.1, **p<.05, ***p<.01, one-tailed tests

Table 6: (OLS) Impact of African American candidates on three key outcome measures for African American and white candidates matched using exact matching on state, party, office sought, and whether the contest was for an open seat, and nearest neighbor matching on all other covariates, including full set of controls. State’s partisanship measured using Major Party Index instead of Hopkins (2009) approach.

|  | % chance of victory  (OLS) | Margin of victory among white voters (OLS) | Margin of victory among all voters (OLS) |
| --- | --- | --- | --- |
| **Black (0=white, 1=black)** | **-15.97**  **(13.08)** | **-18.10*****  **(3.05)** | **-9.41****  **(3.86)** |
| Quality – previous experience (0=least, 3=most) | -7.49  (7.98) | -2.08  (1.86) | -1.59  (2.36) |
| Quality – fundraising total (in millions) | 0.76  (1.75) | 1.06***  (0.41) | 0.67  (0.52) |
| Open seat (0=no, 1=yes) | 40.17**  (19.28) | 25.18***  (4.50) | 13.67**  (5.70) |
| Ideological extremity (absolute value of CF score) | -12.92  (23.96) | 5.02  (5.59) | -2.33  (7.08) |
| State economic performance | 0.34  (3.68) | -1.94**  (0.86) | -2.27**  (1.09) |
| Major Party Index (%; neg=favors opp party, pos=favors own party) | 1.13  (0.89) | 0.01  (0.21) | 0.50**  (0.26) |
| Black population in state (%) | 0.20  (0.69) | -1.18***  (0.16) | -0.20  (0.20) |
| Male (0=female, 1=male) | 20.77  (23.61) | 6.13  (5.51) | -4.86  (6.98) |
| Running for U.S. Senate (0=running for governor, 1=running for U.S. Senate) | 0.60  (15.20) | -8.92***  (3.55) | -2.93  (4.49) |
| (intercept) | 6.46  (43.89) | -10.23  (10.25) | 4.69  (12.97) |
| N | 34 | 34 | 34 |
| Adjusted R-squared | 0.23 | 0.91 | 0.59 |

*p<0.1; **p<0.05; ***p<0.01, all one-tailed tests

Table 7: (OLS) Impact of African American candidates on three key outcome measures for African American and white candidates matched using exact matching on state, party, and office sought and nearest neighbor matching on all other covariates, including full set of controls. State’s partisanship measured using Major Party Index instead of Hopkins (2009) approach.

|  | % chance of victory  (OLS) | Margin of victory among white voters (OLS) | Margin of victory among all voters (OLS) |
| --- | --- | --- | --- |
| **Black (0=white, 1=black)** | **-19.38****  **(9.45)** | **-15.19*****  **(4.72)** | **-9.27*****  **(3.24)** |
| Quality – previous experience (0=least, 3=most) | -0.83  (6.48) | -0.06  (3.24) | 0.45  (2.22) |
| Quality – fundraising total (in millions) | 2.07**  (0.92) | 1.34***  (0.46) | 0.76**  (0.32) |
| Open seat (0=no, 1=yes) | 8.93  (13.39) | 18.14***  (6.69) | 10.32**  (4.58) |
| Ideological extremity (absolute value of CF score) | -10.69  (18.11) | 26.66***  (9.05) | -1.47  (6.20) |
| State economic performance | 0.38  (2.60) | -0.12  (1.30) | -0.85  (0.89) |
| Major Party Index (%; neg=favors opp party, pos=favors own party) | 1.26**  (0.66) | -0.20  (0.33) | 0.68***  (0.23) |
| Black population in state (%) | -0.17  (0.48) | -0.89***  (0.24) | 0.06  (0.17) |
| Male (0=female, 1=male) | 7.16  (17.52) | 0.27  (8.76) | 0.64  (6.00) |
| Running for U.S. Senate (0=running for governor, 1=running for U.S. Senate) | -1.89  (11.88) | -12.96**  (5.94) | -3.62  (4.07) |
| (intercept) | 22.67  (27.36) | -34.63***  (13.67) | -14.58*  (9.37) |
| N | 46 | 46 | 46 |
| Adjusted R-squared | 0.38 | 0.71 | 0.65 |

*p<0.1; **p<0.05; ***p<0.01, all one-tailed tests

Table 8: (OLS) Impact of African American candidates on three key outcome measures for African American and white candidates matched using nearest neighbor matching on all covariates, including full set of controls. State’s partisanship measured using Major Party Index instead of Hopkins (2009) approach.

|  | % chance of victory  (OLS) | Margin of victory among white voters (OLS) | Margin of victory among all voters (OLS) |
| --- | --- | --- | --- |
| **Black (0=white, 1=black)** | **-13.80***  **(8.76)** | **-12.63*****  **(4.26)** | **-10.04*****  **(3.17)** |
| Quality – previous experience (0=least, 3=most) | 2.11  (4.61) | 6.10***  (2.24) | 2.45*  (1.67) |
| Quality – fundraising total (in millions) | 0.77*  (0.53) | 0.24  (0.26) | 0.19  (0.19) |
| Open seat (0=no, 1=yes) | 13.90  (11.71) | 12.40**  (5.69) | 9.00**  (4.24) |
| Ideological extremity (absolute value of CF score) | -4.20  (14.90) | 12.97**  (7.24) | -6.77  (5.39) |
| State economic performance | 3.62**  (2.04) | 2.09**  (0.99) | -0.23  (0.74) |
| Major Party Index (%; neg=favors opp party, pos=favors own party) | 1.39***  (0.56) | 0.36  (0.27) | 0.85***  (0.20) |
| Black population in state (%) | -0.21  (0.43) | -1.00***  (0.21) | -0.12  (0.16) |
| Male (0=female, 1=male) | 9.73  (18.05) | 10.58  (8.77) | 7.94  (6.53) |
| Running for U.S. Senate (0=running for governor, 1=running for U.S. Senate) | 3.63  (9.74) | -9.95**  (4.74) | -2.54  (3.53) |
| (intercept) | -3.77  (23.78) | -44.13***  (11.56) | -14.86**  (8.60) |
| N | 46 | 46 | 46 |
| Adjusted R-squared | 0.37 | 0.72 | 0.60 |

*p<0.1; **p<0.05; ***p<0.01, all one-tailed tests

Table 9: (OLS) Impact of African American candidates on three key outcome measures using a state’s non-white population as a control instead of a state’s black population

|  | % chance of victory  (OLS) | Margin of victory among white voters (OLS) | Margin of victory among all voters (OLS) |
| --- | --- | --- | --- |
| **Black (0=white, 1=black)** | **-14.75***  **(11.21)** | **-11.24*****  **(4.05)** | **-6.99****  **(3.33)** |
| Quality – previous experience (0=least, 3=most) | -0.71  (5.14) | 1.03  (1.86) | 0.65  (1.53) |
| Quality – fundraising total (in millions) | -0.27  (0.66) | 0.14  (0.24) | 0.06  (0.20) |
| Open seat (0=no, 1=yes) | 21.58**  (11.75) | 15.02***  (4.24) | 15.39***  (3.49) |
| Ideological extremity (absolute value of CF score) | -24.50  (22.24) | 5.44  (8.03) | 0.07  (6.60) |
| State economic performance | 2.93  (3.32) | -0.22  (1.20) | 1.10  (0.99) |
| Party advantage (%; neg=favors opp party, pos=favors own party) | 0.47  (1.21) | 1.37***  (0.44) | 1.09***  (0.36) |
| Non-white population in state (%) | -3.20  (3.98) | -3.18**  (1.44) | -3.20***  (1.18) |
| Male (0=female, 1=male) | 30.90**  (13.49) | 5.82  (4.87) | 3.45  (4.01) |
| Running for U.S. Senate (0=running for governor, 1=running for U.S. Senate) | -57.61  (80.71) | 90.17***  (29.14) | 46.96**  (23.96) |
| (intercept) | 204.09*  (130.89) | -56.69  (47.26) | 14.53  (38.85) |
| State fixed effects | Yes | Yes | Yes |
| Party-Year fixed effects | Yes | Yes | Yes |
| N | 92 | 92 | 92 |
| Adjusted R-squared | 0.47 | 0.85 | 0.72 |

*p<.1, **p<.05, ***p<.01, one-tailed tests

Table 10: (OLS) Impact of African American candidates on three key outcome measures for African American and white candidates matched using exact matching on state, party, office sought, and whether the contest was for an open seat, and nearest neighbor matching on all other covariates, including full set of controls. A state’s non-white population is included as a control instead of a state’s black population.

|  | % chance of victory  (OLS) | Margin of victory among white voters (OLS) | Margin of victory among all voters (OLS) |
| --- | --- | --- | --- |
| **Black (0=white, 1=black)** | **-19.09***  **(13.93)** | **-17.24*****  **(3.95)** | **-9.99****  **(4.24)** |
| Quality – previous experience (0=least, 3=most) | -7.15  (8.23) | -3.72*  (2.34) | -1.88  (2.51) |
| Quality – fundraising total (in millions) | 1.14  (1.86) | 1.78***  (0.53) | 0.94*  (0.57) |
| Open seat (0=no, 1=yes) | 43.58**  (19.85) | 25.64***  (5.63) | 15.28***  (6.04) |
| Ideological extremity (absolute value of CF score) | -7.03  (25.24) | 6.18  (7.17) | -0.37  (7.68) |
| State economic performance | 1.33  (3.94) | -2.49**  (1.12) | -2.21**  (1.20) |
| Party advantage (%; neg=favors opp party, pos=favors own party) | 0.02  (0.70) | 0.15  (0.20) | 0.11  (0.21) |
| Non-white population in state (%) | 0.48  (0.78) | -1.11***  (0.22) | -0.19  (0.24) |
| Male (0=female, 1=male) | 27.40  (24.12) | 1.78  (6.85) | -3.33  (7.34) |
| Running for U.S. Senate (0=running for governor, 1=running for U.S. Senate) | -3.72  (18.26) | -5.66  (5.18) | -2.46  (5.56) |
| (intercept) | -20.02  (52.33) | 2.70  (14.86) | 1.52  (15.93) |
| N | 34 | 34 | 34 |
| Adjusted R-squared | 0.18 | 0.86 | 0.53 |

*p<.1, **p<.05, ***p<.01, one-tailed tests

Table 11: (OLS) Impact of African American candidates on three key outcome measures for African American and white candidates matched using exact matching on state, party, and office sought, and nearest neighbor matching on all other covariates, including full set of controls. A state’s non-white population is included as a control instead of a state’s black population.

|  | % chance of victory  (OLS) | Margin of victory among white voters (OLS) | Margin of victory among all voters (OLS) |
| --- | --- | --- | --- |
| **Black (0=white, 1=black)** | **-21.78****  **(9.62)** | **-14.47*****  **(4.96)** | **-10.57*****  **(3.50)** |
| Quality – previous experience (0=least, 3=most) | -0.80  (6.30) | -3.82  (3.24) | 1.35  (2.29) |
| Quality – fundraising total (in millions) | 2.30***  (0.93) | 1.56***  (0.48) | 0.87***  (0.34) |
| Open seat (0=no, 1=yes) | 10.60  (13.52) | 23.37***  (6.96) | 10.65**  (4.91) |
| Ideological extremity (absolute value of CF score) | -9.38  (18.99) | 29.25***  (9.78) | -1.27  (6.90) |
| State economic performance | 1.07  (2.73) | -1.73  (1.40) | -0.47  (0.99) |
| Party advantage (%; neg=favors opp party, pos=favors own party) | 0.53  (0.42) | 0.03  (0.21) | 0.25*  (0.15) |
| Non-white population in state (%) | -0.08  (0.48) | -0.77***  (0.25) | -0.08  (0.17) |
| Male (0=female, 1=male) | 4.83  (17.53) | -10.78  (9.03) | 0.62  (6.37) |
| Running for U.S. Senate (0=running for governor, 1=running for U.S. Senate) | -0.22  (12.81) | -12.50**  (6.60) | -1.54  (4.66) |
| (intercept) | 19.52  (33.70) | -9.60  (17.36) | -15.40  (12.25) |
| N | 46 | 46 | 46 |
| Adjusted R-squared | 0.35 | 0.68 | 0.59 |

*p<.1, **p<.05, ***p<.01, one-tailed tests

Table 12: (OLS) Impact of African American candidates on three key outcome measures for African American and white candidates matched using nearest neighbor matching on all covariates, including full set of controls. A state’s non-white population is included as a control instead of a state’s black population.

|  | % chance of victory  (OLS) | Margin of victory among white voters (OLS) | Margin of victory among all voters (OLS) |
| --- | --- | --- | --- |
| **Black (0=white, 1=black)** | **-16.48****  **(8.67)** | **-12.26****  **(5.64)** | **-10.96*****  **(3.43)** |
| Quality – previous experience (0=least, 3=most) | -3.45  (5.07) | -2.34  (3.30) | 1.37  (2.01) |
| Quality – fundraising total (in millions) | 0.31  (0.56) | 0.39  (0.37) | 0.22  (0.22) |
| Open seat (0=no, 1=yes) | 20.85**  (11.36) | 20.39***  (7.39) | 12.09***  (4.49) |
| Ideological extremity (absolute value of CF score) | -14.57  (14.25) | 28.72***  (9.27) | -2.61  (5.64) |
| State economic performance | 1.71  (2.34) | -0.48  (1.53) | -0.95  (0.93) |
| Party advantage (%; neg=favors opp party, pos=favors own party) | 1.13***  (0.37) | 0.20  (0.24) | 0.37***  (0.15) |
| Non-white population in state (%) | -0.27  (0.46) | -0.53**  (0.30) | -0.16  (0.18) |
| Male (0=female, 1=male) | 15.98  (14.65) | -0.63  (9.53) | 1.49  (5.79) |
| Running for U.S. Senate (0=running for governor, 1=running for U.S. Senate) | 0.05  (10.90) | -12.67**  (7.09) | -3.89  (4.31) |
| (intercept) | 29.40  (31.31) | -25.37  (20.37) | -4.61  (12.38) |
| N | 46 | 46 | 46 |
| Adjusted R-squared | 0.38 | 0.53 | 0.52 |

*p<.1, **p<.05, ***p<.01, one-tailed tests

|  |  |  | Preprocessed with matching | | | | | |
| --- | --- | --- | --- | --- | --- | --- | --- | --- |
|  |  |  | Exact on party, state, office, and open seat; nearest neighbor on other covariates | | Exact on party, state, and office; nearest neighbor on other covariates | | Nearest neighbor on all covariates | |
|  | Bivariate | Multivariate  (OLS) | Bivariate | Multivariate  (OLS) | Bivariate | Multivariate  (OLS) | Bivariate | Multivariate  (OLS) |
| Margin of victory among white voters (%) | -12.91**  (9.17) | -12.59**  (5.83) | -22.25*  (14.73) | -28.90***  (2.31) | -12.57  (11.41) | -10.78*  (6.76) | -13.50*  (9.98) | -22.66***  (7.09) |
| State and party-year fixed effects? | -- | Yes | -- | No | -- | No | -- | No |
| N black/N white | 15/54 | 15/54 | 8/8 | 8/8 | 14/14 | 14/14 | 14/14 | 14/14 |

Table 13: Impact of African American candidates on margin of victory among white voters using only exit polls

15

Bivariate estimates are simple comparisons between African American and white candidates for the margin of victory among white voters. Multivariate OLS estimates use the margin of victory among white voters as the dependent variable, candidate race (1=black, 0=white) as the key independent variable, and the variables listed in Table 3 as controls. State and party-year fixed effects are accounted for in column 2, but not columns 4, 6, and 8.

*p<0.1; **p<0.05; ***p<0.01, one-tailed tests

Table 14: Impact of African American candidates on margin of victory among white voters using exit polls when available and ecological inference when exit polls are not available

16

|  |  |  | Preprocessed with matching | | | | | |
| --- | --- | --- | --- | --- | --- | --- | --- | --- |
|  |  |  | Exact on party, state, office, and open seat; nearest neighbor on other covariates | | Exact on party, state, and office; nearest neighbor on other covariates | | Nearest neighbor on all covariates | |
|  | Bivariate | Multivariate  (OLS) | Bivariate | Multivariate  (OLS) | Bivariate | Multivariate  (OLS) | Bivariate | Multivariate  (OLS) |
| Margin of victory among white  voters (%) | -21.14***  (7.09) | -22.09***  (5.30) | -24.41**  (10.24) | -26.13***  (5.44) | -21.39**  (9.35) | -21.87***  (6.25) | -26.70***  (8.56) | -19.48***  (5.43) |
| State and party-year fixed effects? | -- | Yes | -- | No | -- | No | -- | No |
| N black/N white | 24/75 | 23/69 | 17/17 | 17/17 | 23/23 | 23/23 | 23/23 | 23/23 |

Bivariate estimates are simple comparisons between African American and white candidates for the margin of victory among white voters. Multivariate OLS estimates use the margin of victory among white voters as the dependent variable, candidate race (1=black, 0=white) as the key independent variable, and the variables listed in Table 3 as controls. State and party-year fixed effects are accounted for in column 2, but not columns 4, 6, and 8.

*p<0.1; **p<0.05; ***p<0.01, one-tailed tests

Table 15: Impact of African American candidates on margin of victory among white voters using ecological inference

17

|  |  |  | Preprocessed with matching | | | | | |
| --- | --- | --- | --- | --- | --- | --- | --- | --- |
|  |  |  | Exact on party, state, office, and open seat; nearest neighbor on other covariates | | Exact on party, state, and office; nearest neighbor on other covariates | | Nearest neighbor on all covariates | |
|  | Bivariate | Multivariate  (OLS) | Bivariate | Multivariate  (OLS) | Bivariate | Multivariate  (OLS) | Bivariate | Multivariate  (OLS) |
| Margin of victory among white voters (%) | -17.66**  (8.69) | -17.48***  (6.68) | -21.29**  (11.44) | -25.48***  (7.43) | -19.48**  (10.93) | -19.57***  (7.93) | -18.30**  (10.04) | -11.16*  (7.23) |
| State and party-year fixed effects? | -- | Yes | -- | No | -- | No | -- | No |
| N black/N white | 24/75 | 23/69 | 17/17 | 17/17 | 23/23 | 23/23 | 23/23 | 23/23 |

Bivariate estimates are simple comparisons between African American and white candidates for the margin of victory among white voters. Multivariate OLS estimates use the margin of victory among white voters as the dependent variable, candidate race (1=black, 0=white) as the key independent variable, and the variables listed in Table 3 as controls. State and party-year fixed effects are accounted for in column 2, but not columns 4, 6, and 8.

*p<0.1; **p<0.05; ***p<0.01, one-tailed tests
